# Supplementary material for: Cell Assembly Dynamics of Sparsely-Connected Inhibitory Networks: A Simple Model for the Collective Activity of Striatal Projection Neurons
Source: PubMed Central journal article supplement (PMC4767417; doi:10.1371/journal.pcbi.1004778), 2016-02-25
Supplement: pcbi.1004778.s002.pdf [file pcbi.1004778.s002.pdf]

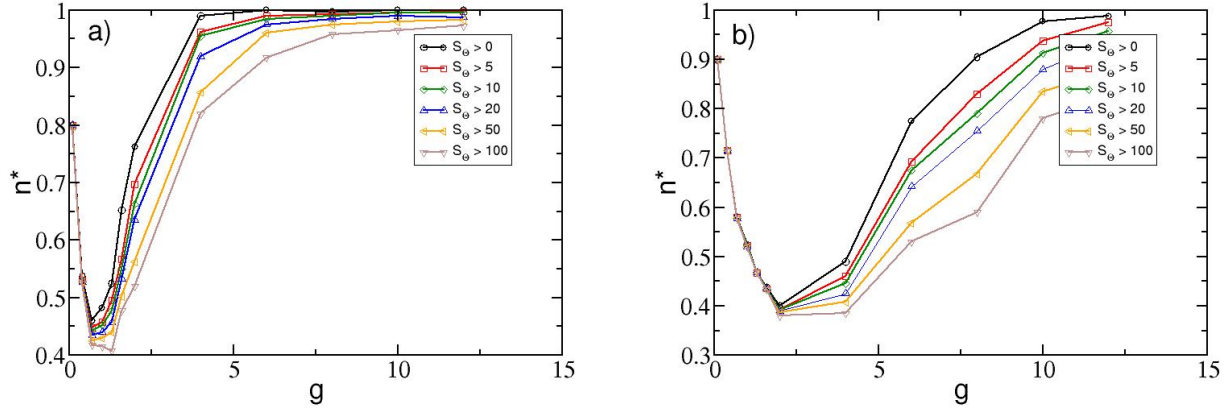

S 1. Fig. **Dependence of the value  $n^*$  on the chosen threshold  $S_\Theta$**  Fraction of active neurons  $n^*$  vs the synaptic strength, for several threshold definitions. A neuron is considered silent whenever it does not spike at least  $S_\Theta$ -times during the observation time. Panel a) for  $\Delta V = 1$  mV and b) for  $\Delta V = 5$  mV. The system is left to evolve during  $10^7$  spikes, after discarding  $10^5$  spike events of transient. Other parameters used in the simulation:  $K = 20$ ,  $N = 400$  and  $\tau_\alpha = 20$ ms.
