# Supplementary material for: Cell Assembly Dynamics of Sparsely-Connected Inhibitory Networks: A Simple Model for the Collective Activity of Striatal Projection Neurons
Source: PubMed Central journal article supplement (PMC4767417; doi:10.1371/journal.pcbi.1004778), 2016-02-25
Supplement: pcbi.1004778.s003.pdf [file pcbi.1004778.s003.pdf]

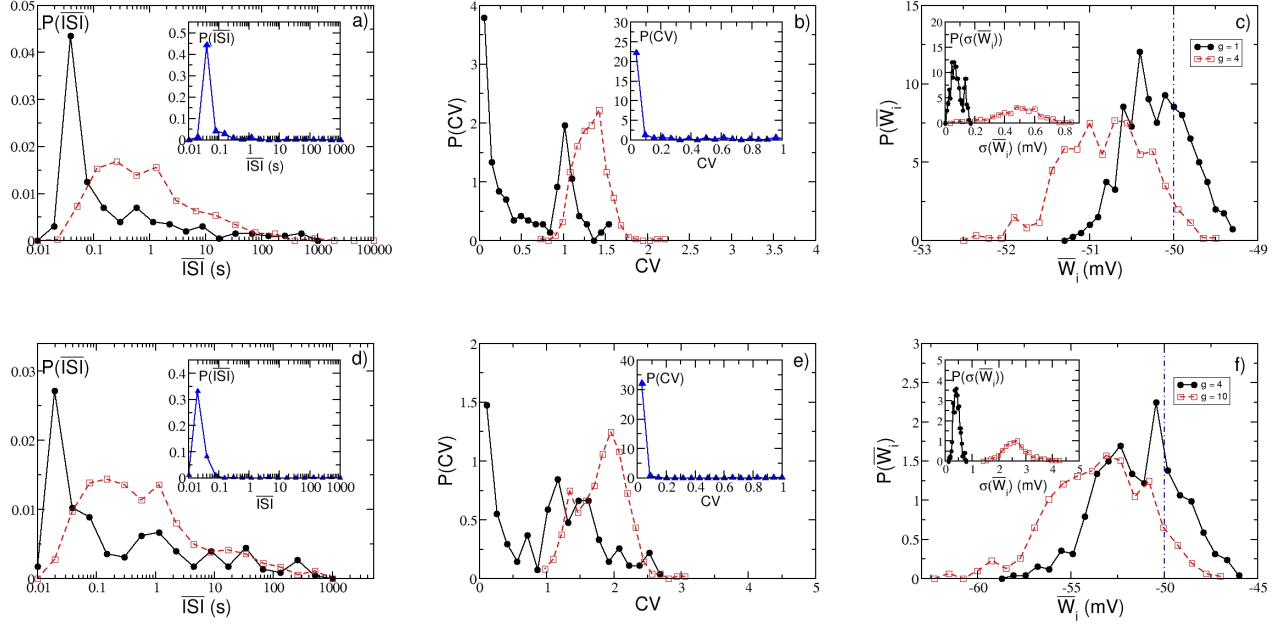

S 2. Fig. **Neuronal statistics.** Neuronal distributions of the average  $\overline{ISI}$  (a,d), of the coefficient of variation  $CV$  (b,e) and of the average effective synaptic input  $\overline{W}_i$  (c,f). The data in the first row are for  $\Delta V = 1$  mV and in the second one for  $\Delta V = 5$  mV. For  $\Delta V = 1$  mV ( $\Delta V = 5$  mV) black solid line with filled circles correspond to  $g = 1$  ( $g = 4$ ) and red dashed lines with open squares to  $g = 4$  ( $g = 10$ ). Insets of (a,d) and (c,f), same as the main figure in a lower  $g$  regime:  $g = 0.4$  ( $g = 1$ ) for  $\Delta V = 1$  mV ( $\Delta V = 5$  mV). The system is left to evolve during  $10^7$  spikes, after discarding  $10^5$  spike events. Other parameters used in the simulation:  $K = 20$ ,  $N = 400$  and  $\tau_\alpha = 20$  ms.
