# Supplementary material for: Cell Assembly Dynamics of Sparsely-Connected Inhibitory Networks: A Simple Model for the Collective Activity of Striatal Projection Neurons
Source: PubMed Central journal article supplement (PMC4767417; doi:10.1371/journal.pcbi.1004778), 2016-02-25
Supplement: pcbi.1004778.s004.pdf [file pcbi.1004778.s004.pdf]

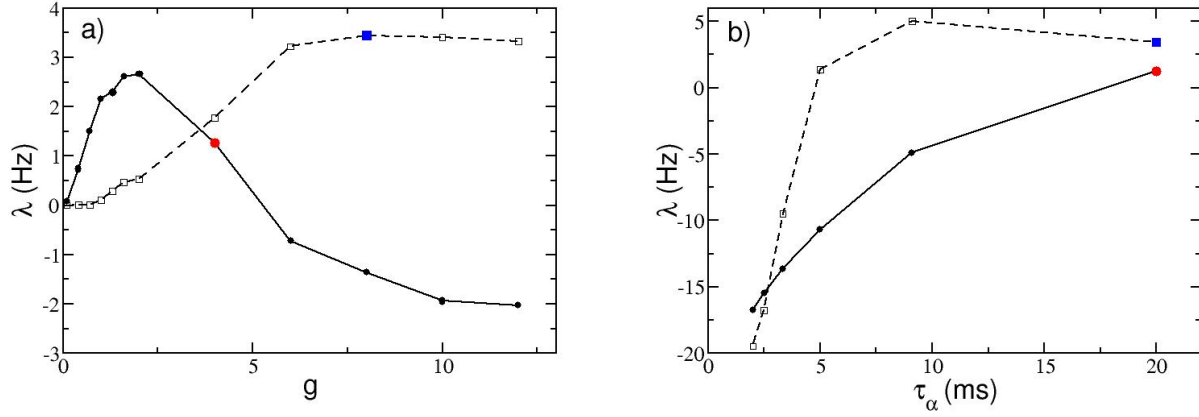

S 3. Fig. **Linear stability analysis.** a) Maximal Lyapunov exponent  $\lambda$  at a fixed  $\tau_\alpha = 20$ , as a function of the synaptic strength for  $\Delta V = 1$  mV (continuous line, filled circles) and  $\Delta V = 5$  mV (dashed line, empty squares). b) Maximal Lyapunov exponent  $\lambda$  as a function of the pulse duration  $\tau_\alpha$  for the parameters  $\{\Delta V, g\} = \{1 \text{ mV}, 4\}$  (continuous line with filled circles) and  $\{5 \text{ mV}, 8\}$  (dashed line with empty squares). In both panels, the blue filled square indicates the triad  $\{\Delta V, g, \tau_\alpha\} = \{5 \text{ mV}, 8, 20 \text{ ms}\}$ , and the red filled circle to  $\{\Delta V, g, \tau_\alpha\} = \{1 \text{ mV}, 4, 20 \text{ ms}\}$ ; these values are associated to the maximum values of  $Q_0$  obtained for excitability distributions with fixed width  $\Delta V$ . The tangent space (S1-S3 Eqs) is evolved during a period corresponding to  $10^6$  spikes, after discarding a transient of  $10^5$  spikes. Other parameters used in the simulation:  $K = 20$ ,  $N = 400$ .
