# Supplementary material for: Cell Assembly Dynamics of Sparsely-Connected Inhibitory Networks: A Simple Model for the Collective Activity of Striatal Projection Neurons
Source: PubMed Central journal article supplement (PMC4767417; doi:10.1371/journal.pcbi.1004778), 2016-02-25
Supplement: pcbi.1004778.s005.pdf [file pcbi.1004778.s005.pdf]

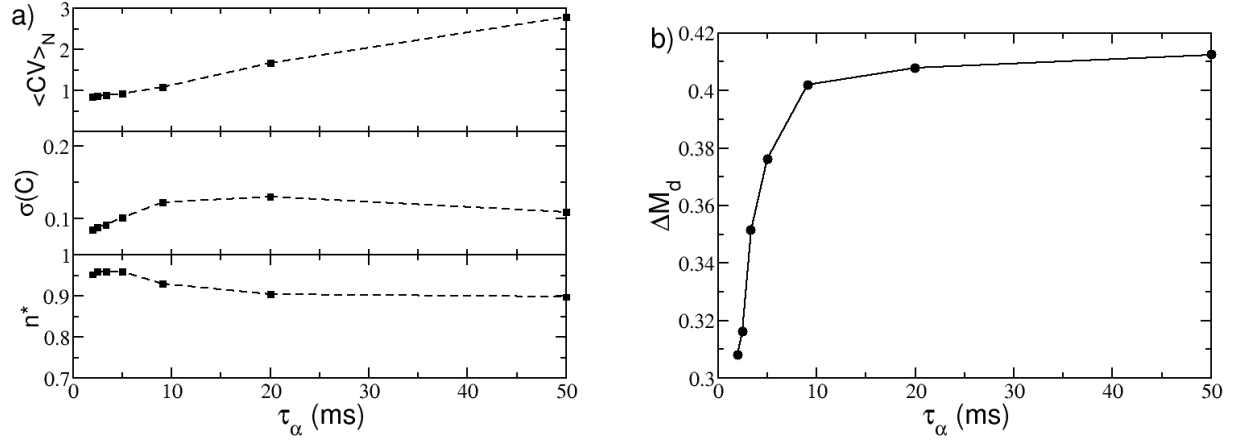

S 4. Fig. **Metrics of the structured activity vs synaptic time decay.** a) Metrics entering in the definition of  $Q_0$  and their dependence from  $\tau_\alpha$ . From top to bottom: Averaged coefficient of variation  $\langle CV \rangle_N$ , standard deviation of the cross-correlation matrix  $\sigma(C)$ , and the fraction of active neurons  $n^*$ . b)  $\Delta M_d$  as a function of  $\tau_\alpha$ . The system is left to evolve during  $10^7$  spikes, after discarding  $10^5$  transient spike events. Parameters here used  $\Delta V = 5$  mV,  $g = 8$ ,  $K = 20$ ,  $N = 400$ .
