# Supplementary material for: Cell Assembly Dynamics of Sparsely-Connected Inhibitory Networks: A Simple Model for the Collective Activity of Striatal Projection Neurons
Source: PubMed Central journal article supplement (PMC4767417; doi:10.1371/journal.pcbi.1004778), 2016-02-25
Supplement: pcbi.1004778.s007.pdf [file pcbi.1004778.s007.pdf]

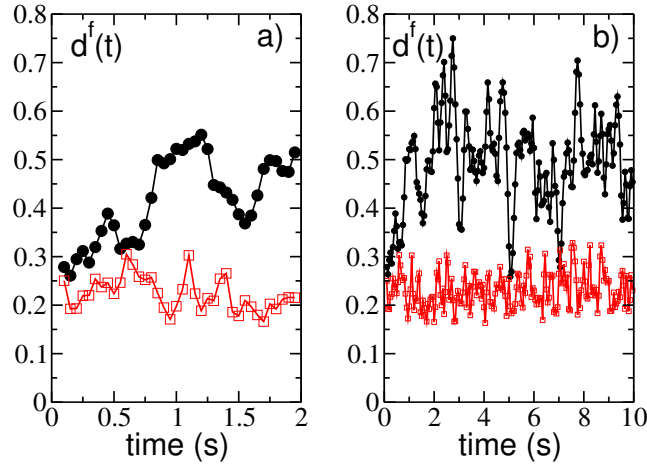

S 6. Fig. **Pattern Separation.** Dissimilarity measure in time for an observation window of length a)  $T_E = 2$  s and b)  $T_E = 10$  s, for two values of  $\tau_\alpha = 20$  ms (black circles) and  $\tau_\alpha = 2$  ms (red squares) at a fixed value of  $f = 0.2$ . It is clearly observed that  $\tau_\alpha = 20$  ms more effectively differentiates the similar inputs in both observation windows, as seen by the larger values of dissimilarity respect to the  $\tau_\alpha = 2$  ms. The initial increase of  $d^f(t)$  observable for  $\tau_\alpha = 20$  ms in panel (a) is probably due to the fact that the dynamics for this choice of parameters is chaotic as shown in the *Linear stability analysis* sub-section. Therefore the increase can be associated to a transient evolution towards the final attractor. Other parameters used:  $\Delta T = 50$  ms,  $g = 8$ ,  $N = 400$ ,  $K = 20$ .
