# Supplementary material for: Cell Assembly Dynamics of Sparsely-Connected Inhibitory Networks: A Simple Model for the Collective Activity of Striatal Projection Neurons
Source: PubMed Central journal article supplement (PMC4767417; doi:10.1371/journal.pcbi.1004778), 2016-02-25
Supplement: pcbi.1004778.s008.pdf [file pcbi.1004778.s008.pdf]

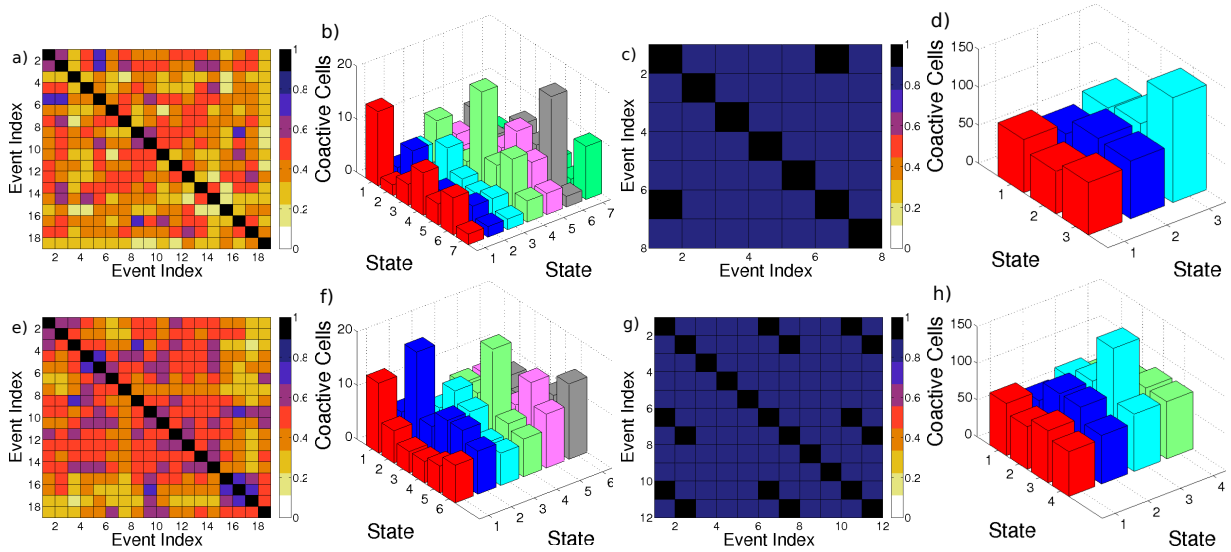

S 7. Fig. **Response of the network to an increase in the excitability.** Two different realizations of the numerical experiment reported in the subsection *Physiological relevance for biological networks under different experimental conditions* of the main text. First (third) column reports two realizations of the SETM estimated for  $g = 8$  ( $g = 1$ ). Second (fourth) column displays the number of coactive cells in the corresponding cases for  $g = 8$  ( $g = 1$ ). The other parameters for the reported simulations are  $\Delta V = 5$  mV,  $K = 20$ ,  $N = 400$ .
